# Supplementary material for: Enhancing electrical performance of cement-based materials by acetylene carbon black addition: applications in paste, mortar, and concrete
Source: Research Square preprint supplement (doi:10.21203/rs.3.rs-6858959/v1), 2025-06-19
Supplement: Supplementary file 1 [file d4d40349c684df5e633d1b0c.docx]

**Supplementary Information**

**Enhancing electrical performance of cement-based materials by acetylene carbon black addition: applications in paste, mortar, and concrete.**

Nattapong Chuewangkam1, Ploychanok Iadrat2, Tarabordin Yurata2, Chuchawin Changtong2, Supree Pinitsoontorn1, 3,*

*1Department of Physics, Faculty of Science, Khon Kaen University, Khon Kaen 40002, THAILAND*

*2R&D Materials and Chemical Department, IRPC Innovation Center, IRPC Public Company Limited, Rayong 21000, THAILAND*

*3Institute of Nanomaterials Research and Innovation for Energy (IN-RIE), Khon Kaen University, Khon Kaen 40002, THAILAND*

* Corresponding author’s e-mail address: [psupree@kku.ac.th](mailto:psupree@kku.ac.th)

**
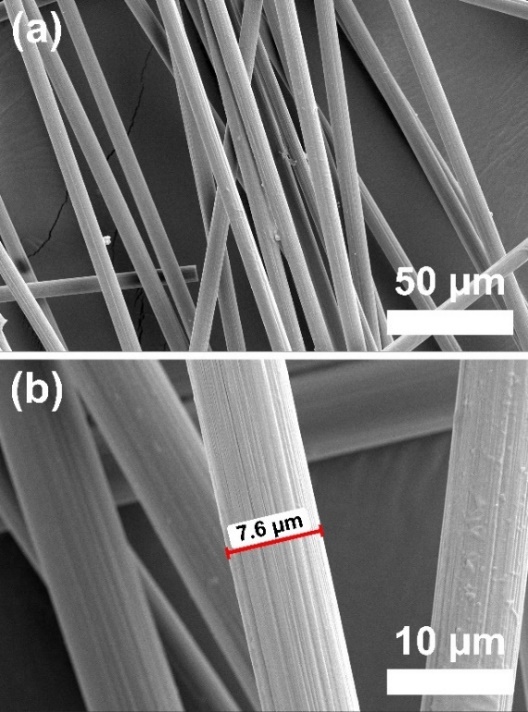
**

**Figure S1.** The SEM micrographs of CF.


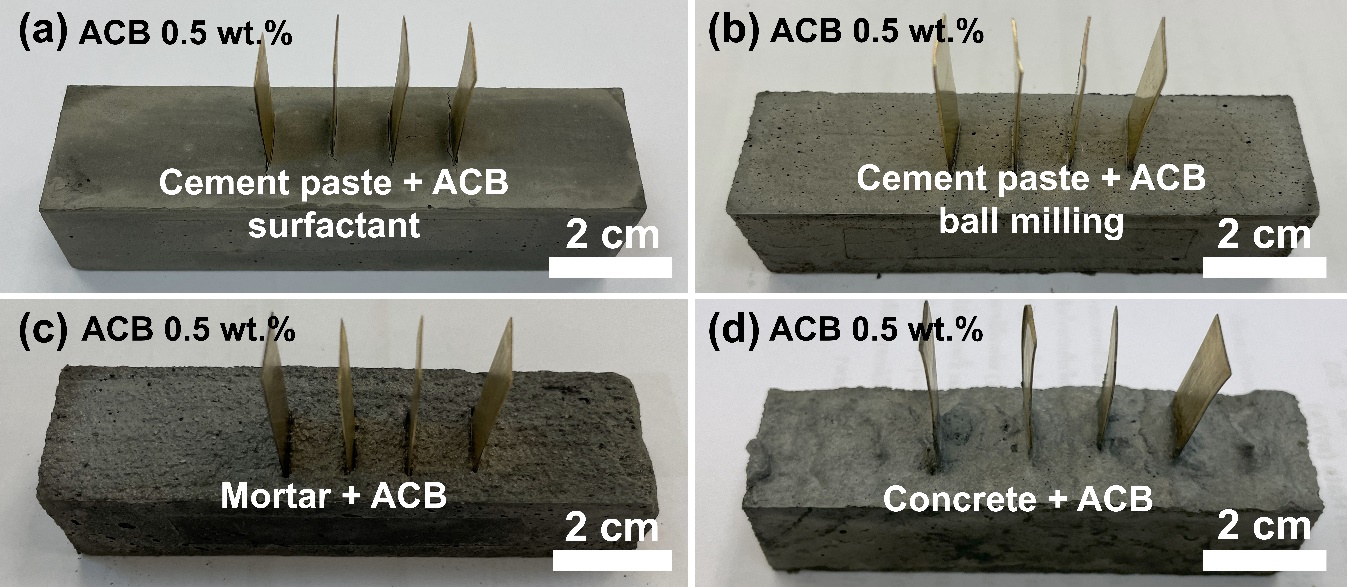


**Figure S2.** Samples cast for the electrical resistivity test containing 0.5 wt.% ACB: (a) Cement paste + ACB: surfactant, (b) Cement paste + ACB: ball milling, (c) Mortar + ACB, and (d) Concrete + ACB.


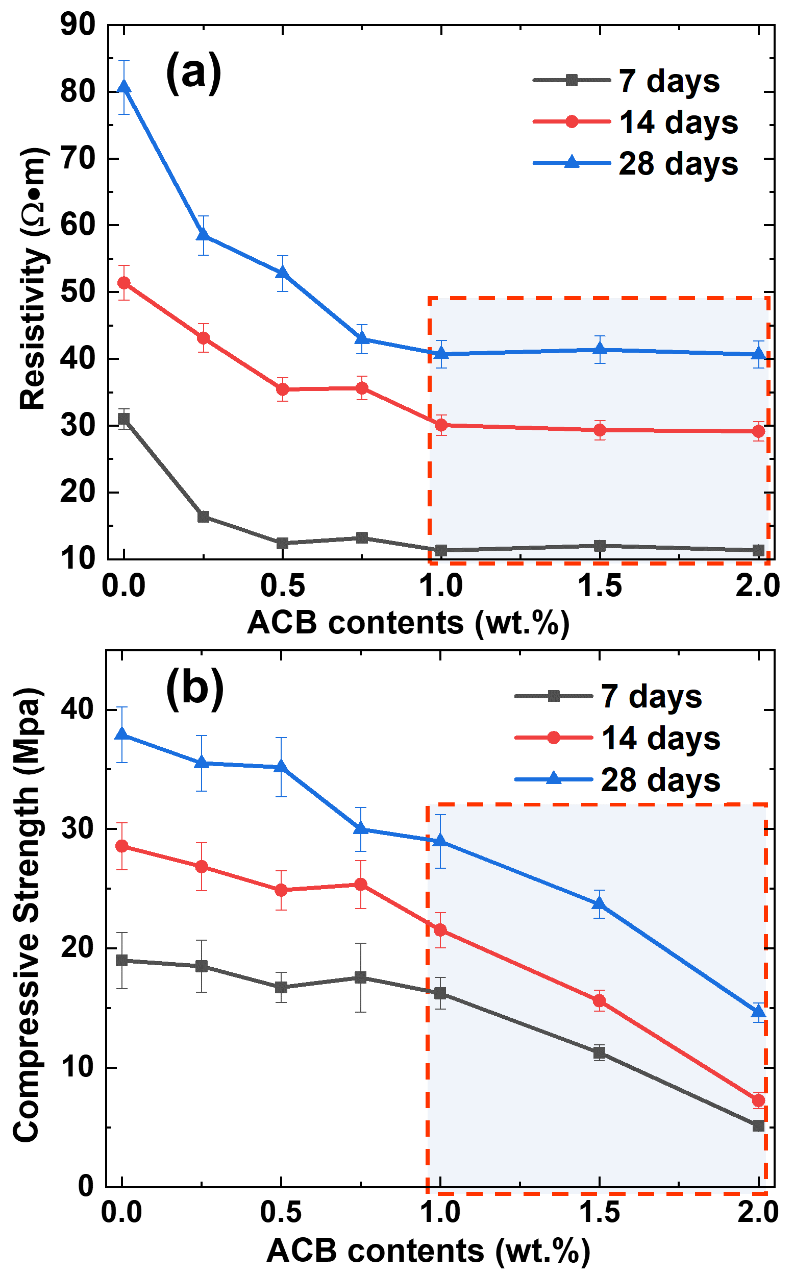


**Figure S3.** Effect of adding ACB in cement paste with ball milling in amounts ranging from 0 to 2 wt.% on (a) electrical resistivity and (b) compressive strength.


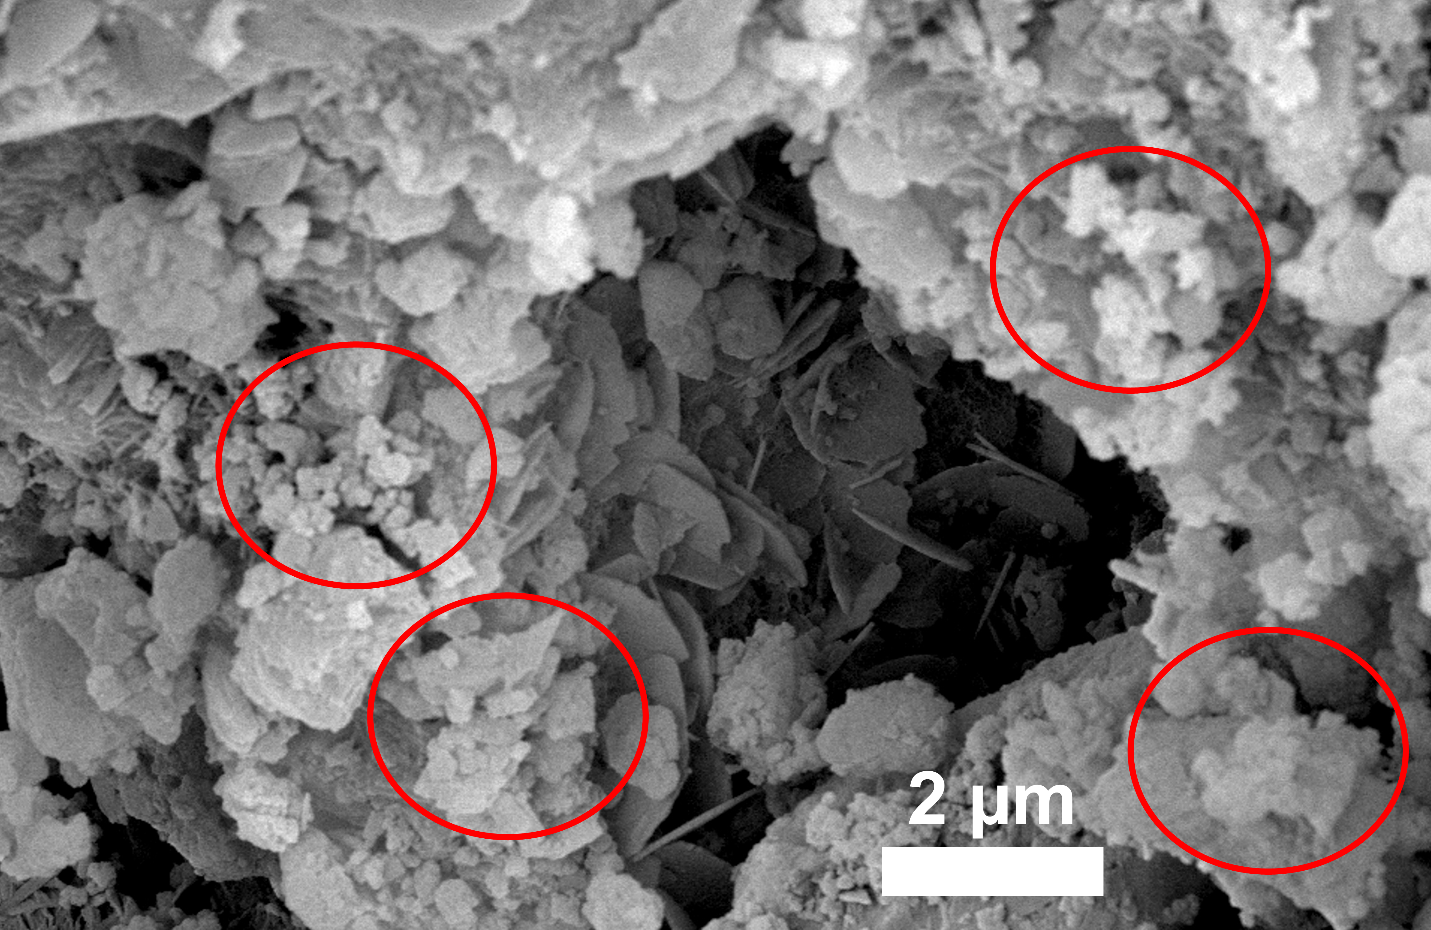


**Figure S4.** High-magnification SEM image of Cement paste + ACB (surfactant) with 1 wt.% ACB, providing a closer view of the ACB morphology and distribution within the cement matrix (zoomed-in from **Figure 5d**).


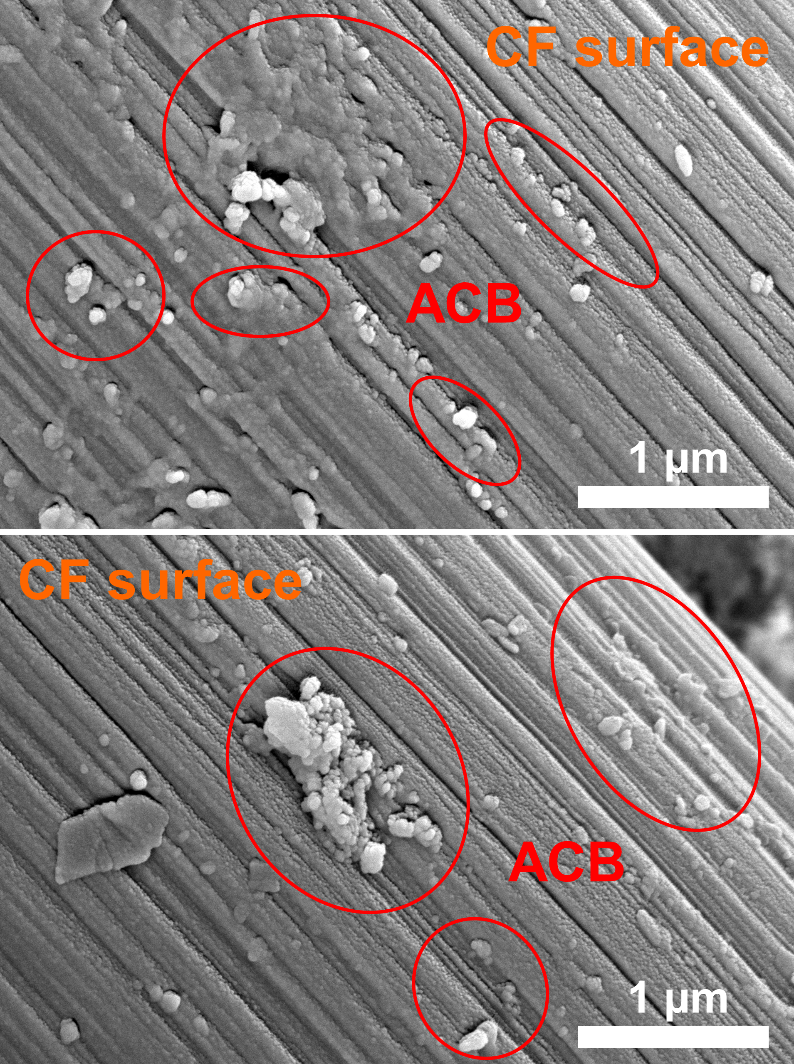


**Figure S5.** Shows the contact between ACB particles and the CF surface in Mortar + ACB specimens.


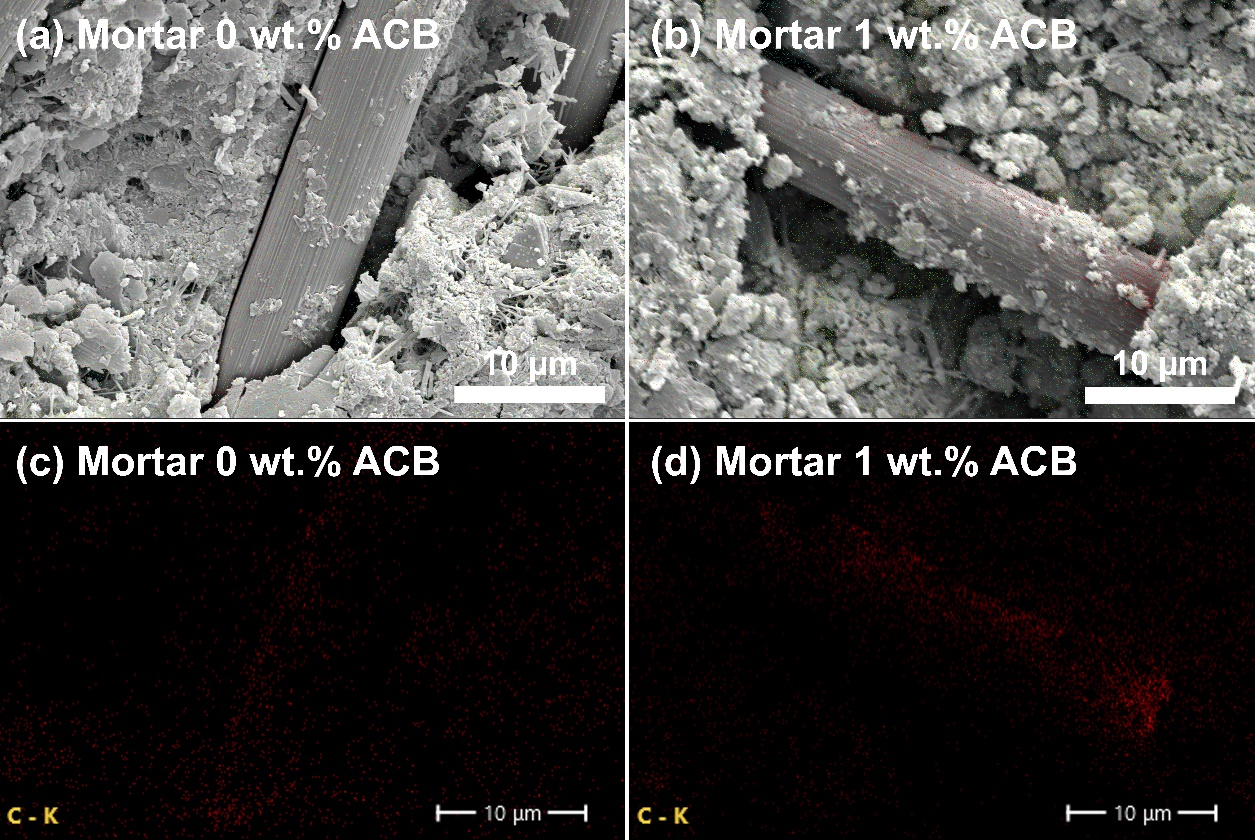


**Figure S6.** Micrograph of Mortar + ACB for EDX mapping analysis: (a) without ACB, (b) with 1 wt.% ACB; and EDX mapping for carbon in these micrographs: (c) without ACB, (d) with 1 wt.% ACB.

The EDX mapping for carbon, shown in **Figures S6c and S6d**, illustrates the presence of carbon in the composites. The carbon mapping highlights the increased presence of ACB in the sample with 1 wt.% ACB, indicating a more extensive conductive network that enhances electrical properties.

**Table S1.** Chemical composition of Mortar + ACB from EDX mapping analysis of the SEM micrograph corresponding in **Figure S6** (a) without ACB (b) 1 wt.% ACB.

| **ACB**  **(wt. %)** | **Composition (at%)** | | | |
| --- | --- | --- | --- | --- |
| **C** | **O** | **Si** | **Ca** |
| 0 | 15.39±0.2 | 54.17±0.6 | 10.65±0.1 | 19.79±0.3 |
| 1 | 18.84±0.1 | 49.05±0.5 | 10.26±0.1 | 21.85±0.2 |


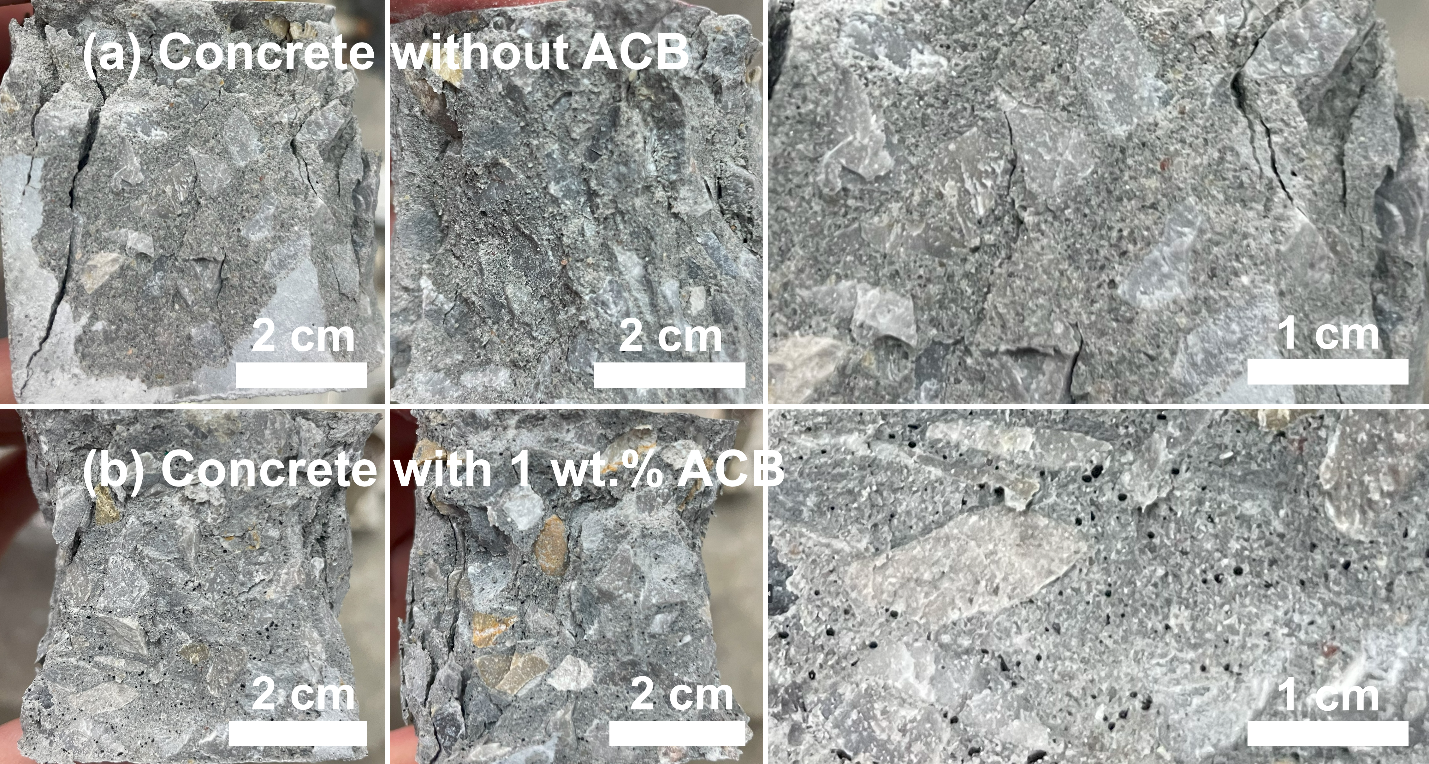


**Figure S7.** Observed macrostructure of concrete (a) without ACB and (b) with adding 1 wt. %ACB.
